# Supplementary material for: Heparan sulphate binding controls in vivo half-life of the HpARI protein family
Source: eLife journal article supplement (doi:10.7554/elife.99000), 2024-08-27

# Fig 1C IL-33 western blot

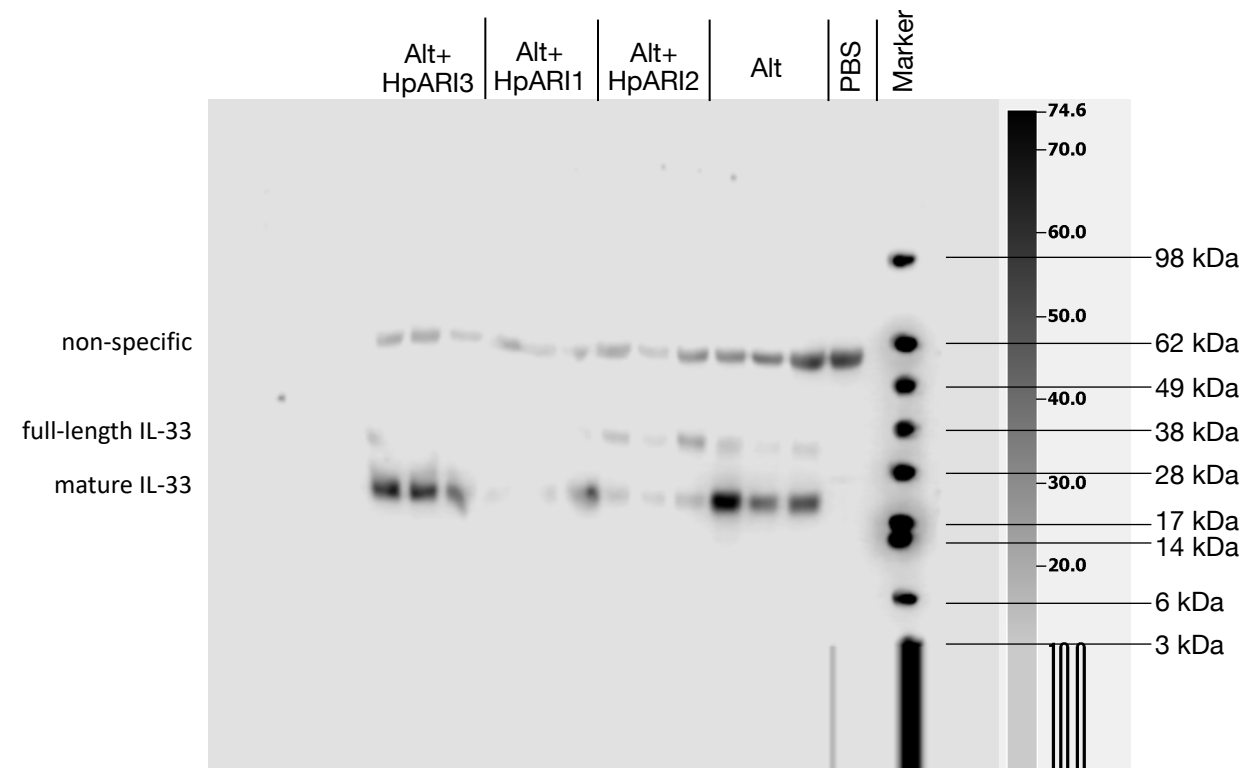

Gel image mirrored to show in Figure 1, Figure Supplement 1.  
Artefact at bottom of gel due to image export process and could not be removed.  
Mature IL-33 band used for densitometry analysis.

## Fig 1D EMSA

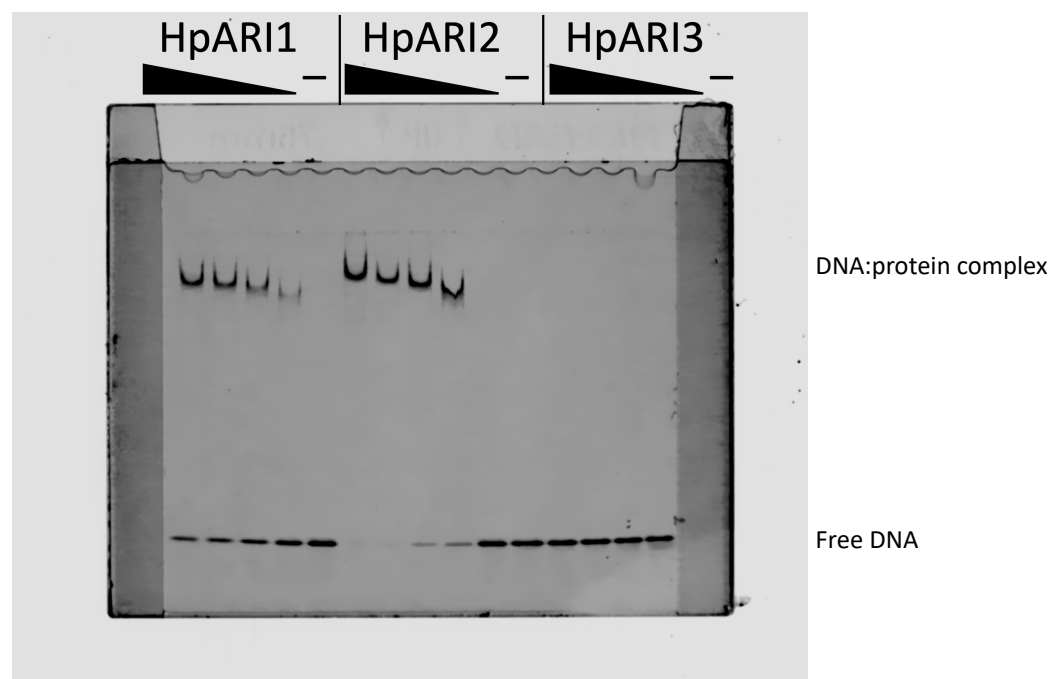

## Fig 1G EMSA

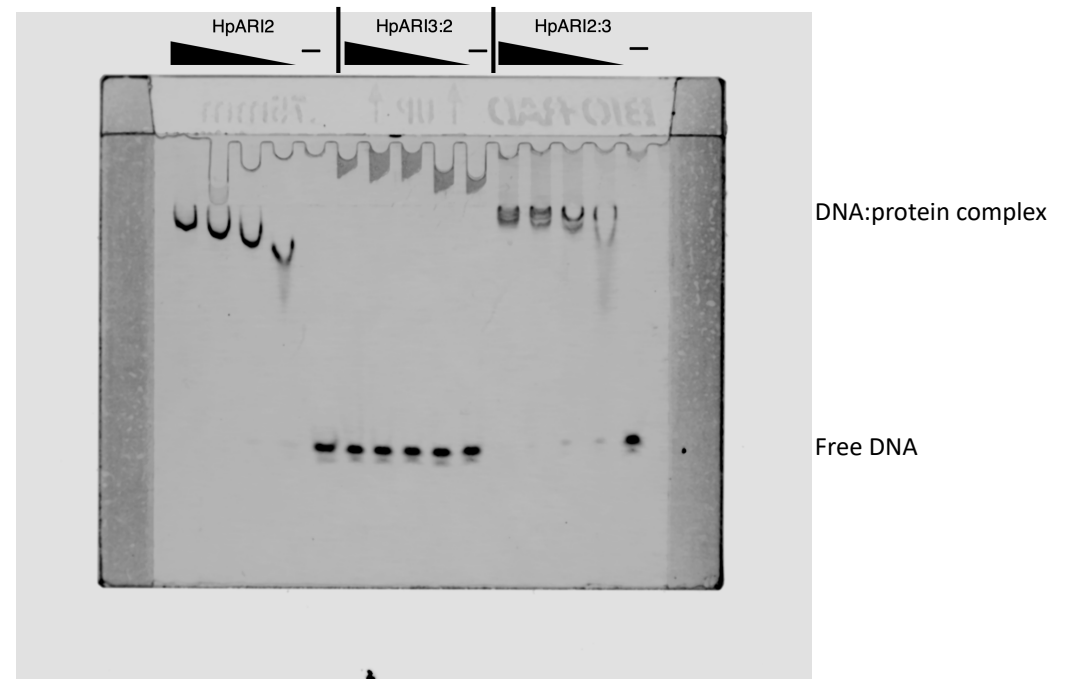

Supplement: fig1-data2 [file elife-99000-fig1-data2-v1.zip]
