# Supplementary figures and images for: Heparan sulphate binding controls in vivo half-life of the HpARI protein family
Source: eLife journal article supplement (doi:10.7554/elife.99000), 2024-08-27

Fig 2B IL-33 western blot

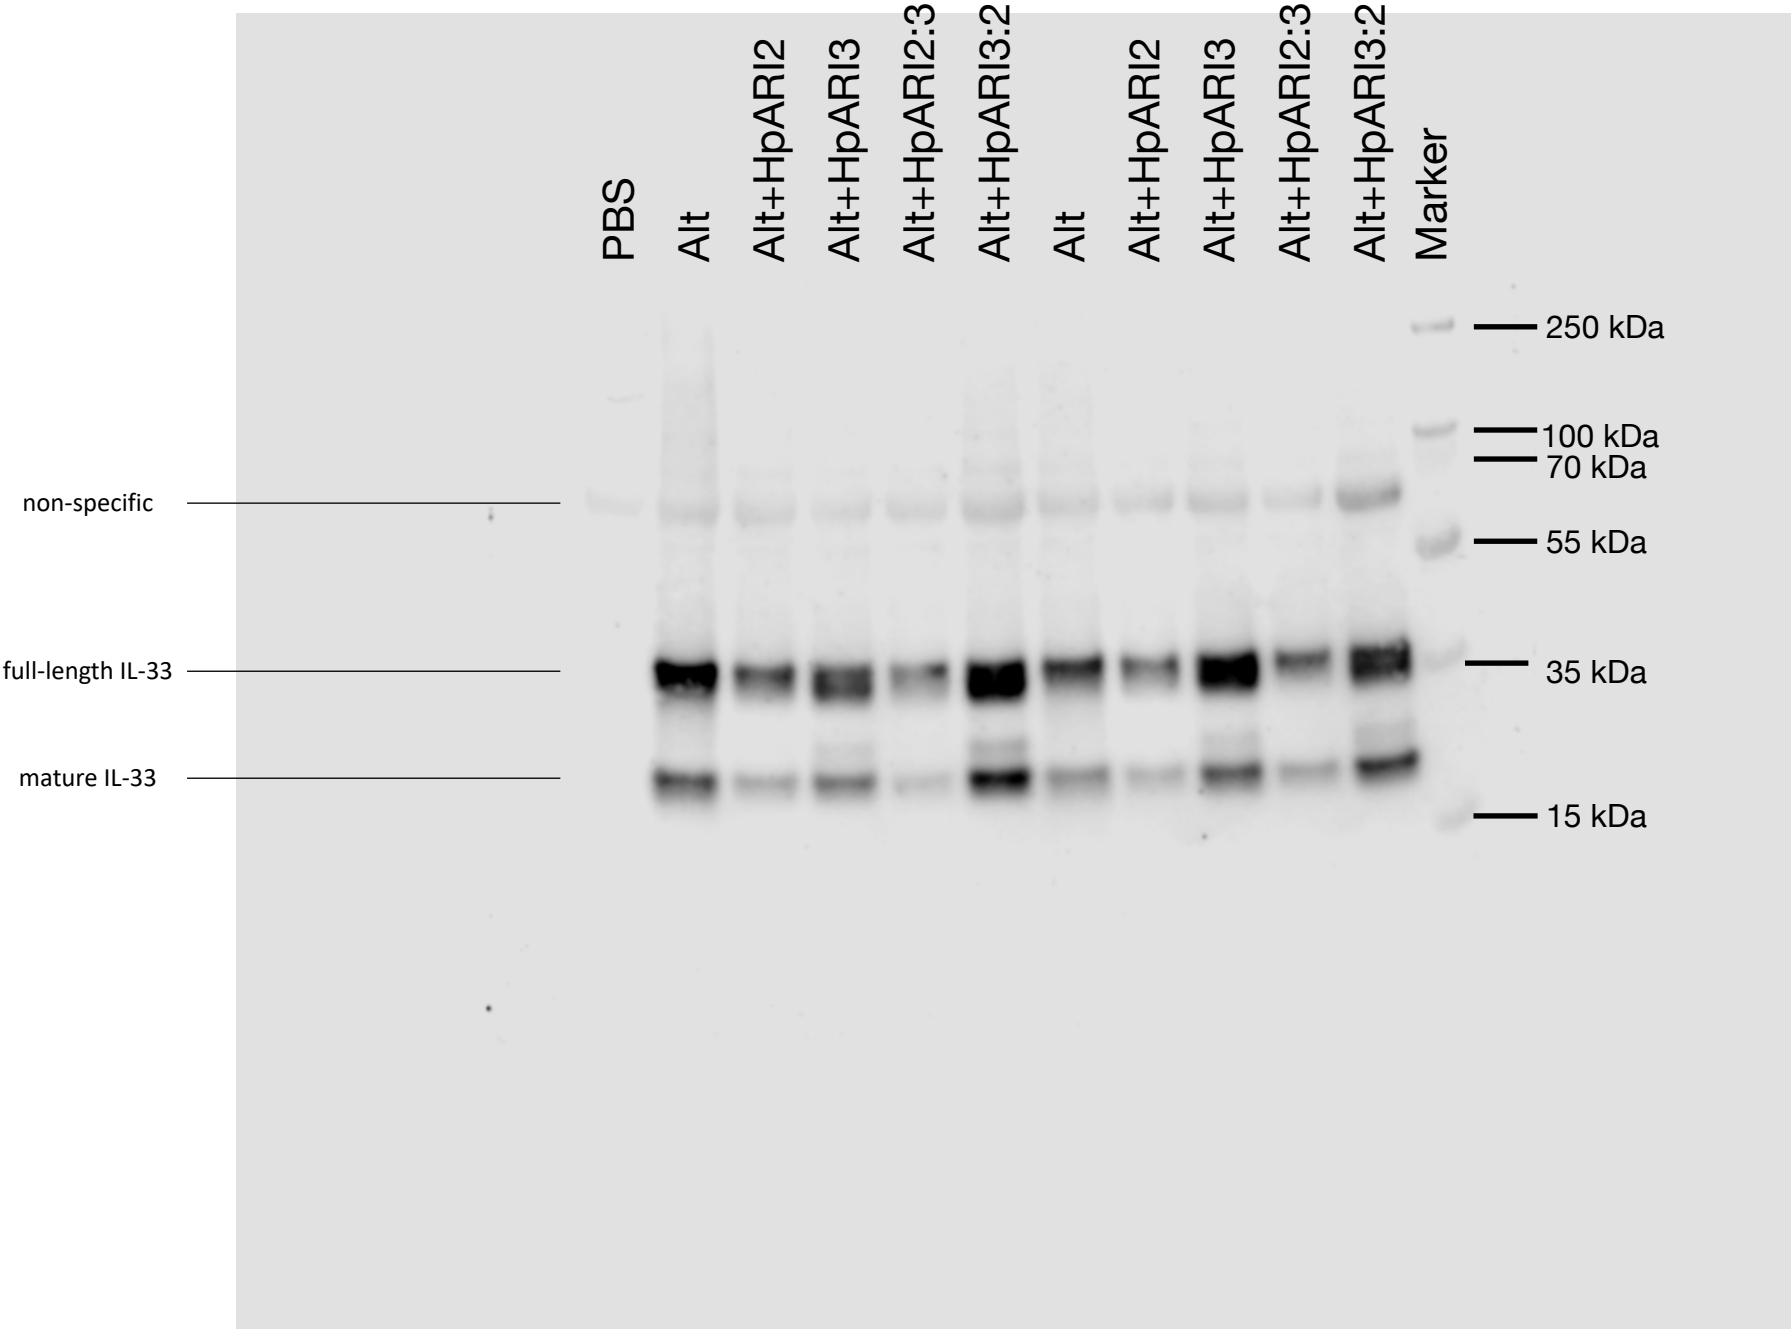

Mature IL-33 band used for densitometry analysis.

Supplement: fig2-data2 [file elife-99000-fig2-data2-v1.zip]

Fig 4B Coomassie-stained gel

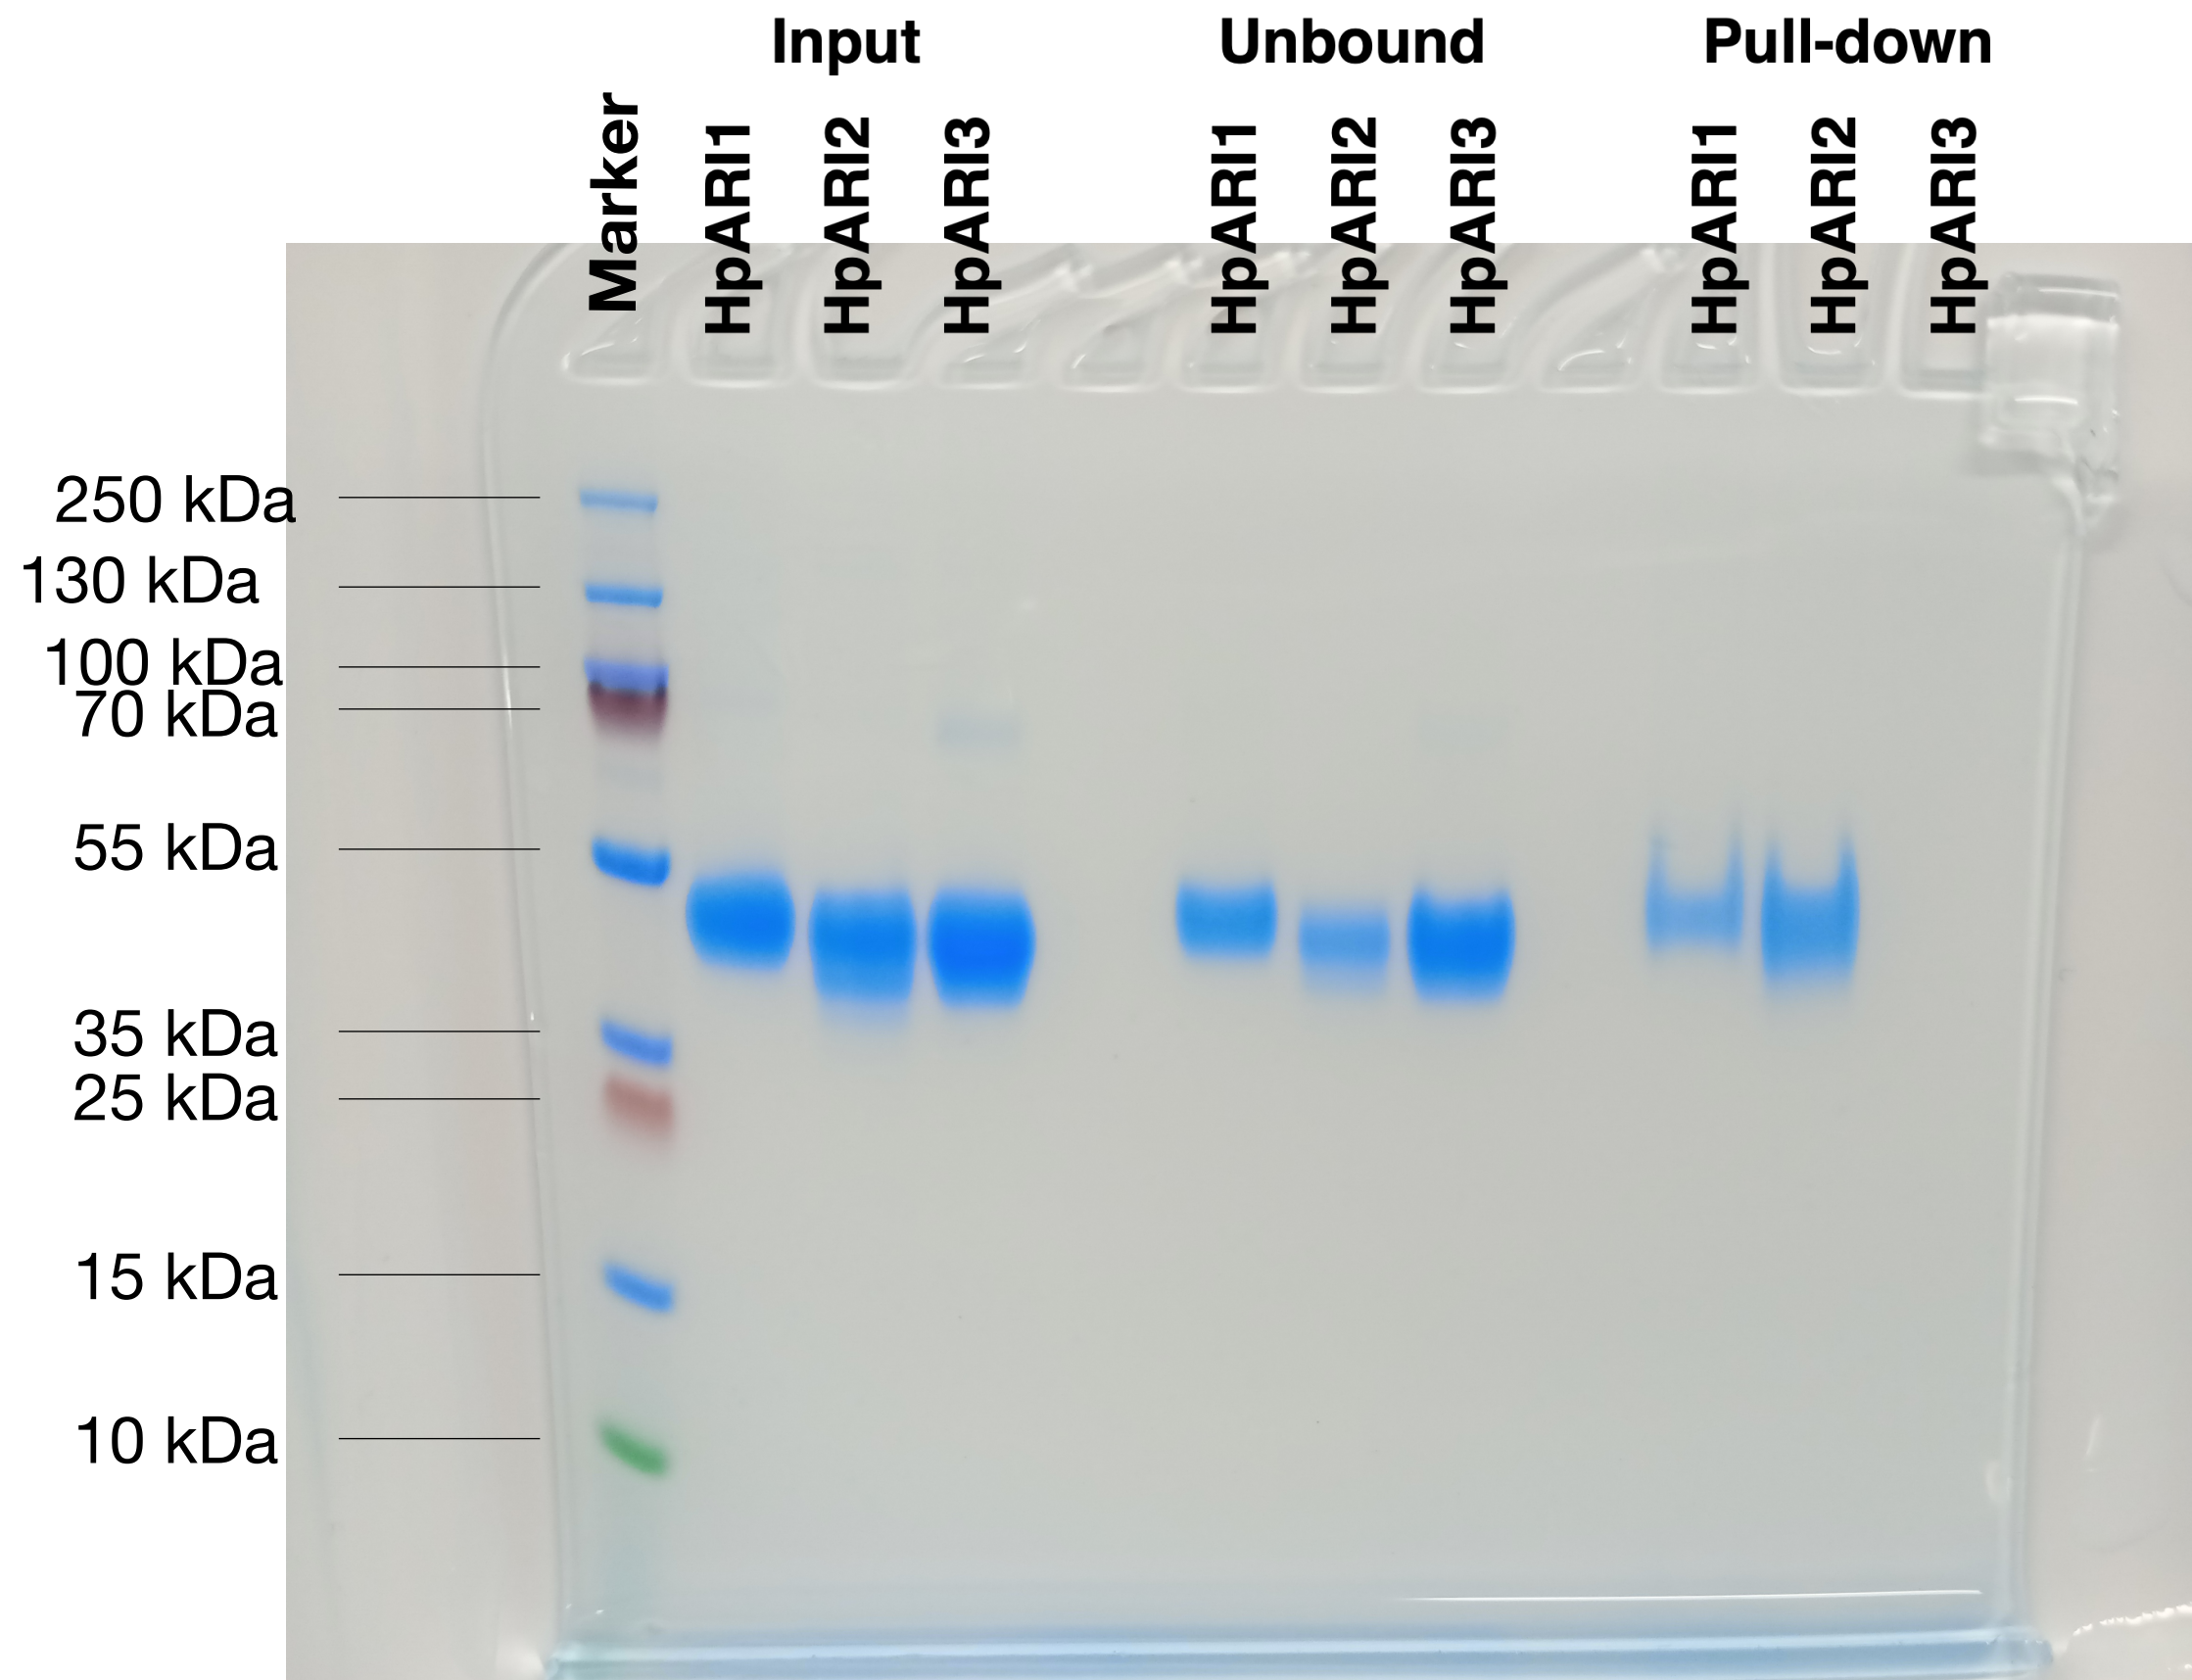

Image made greyscale to show in Fig 4B

Supplement: fig4-data2 [file elife-99000-fig4-data2-v1.zip]

# Fig 6B Coomassie-stained gels

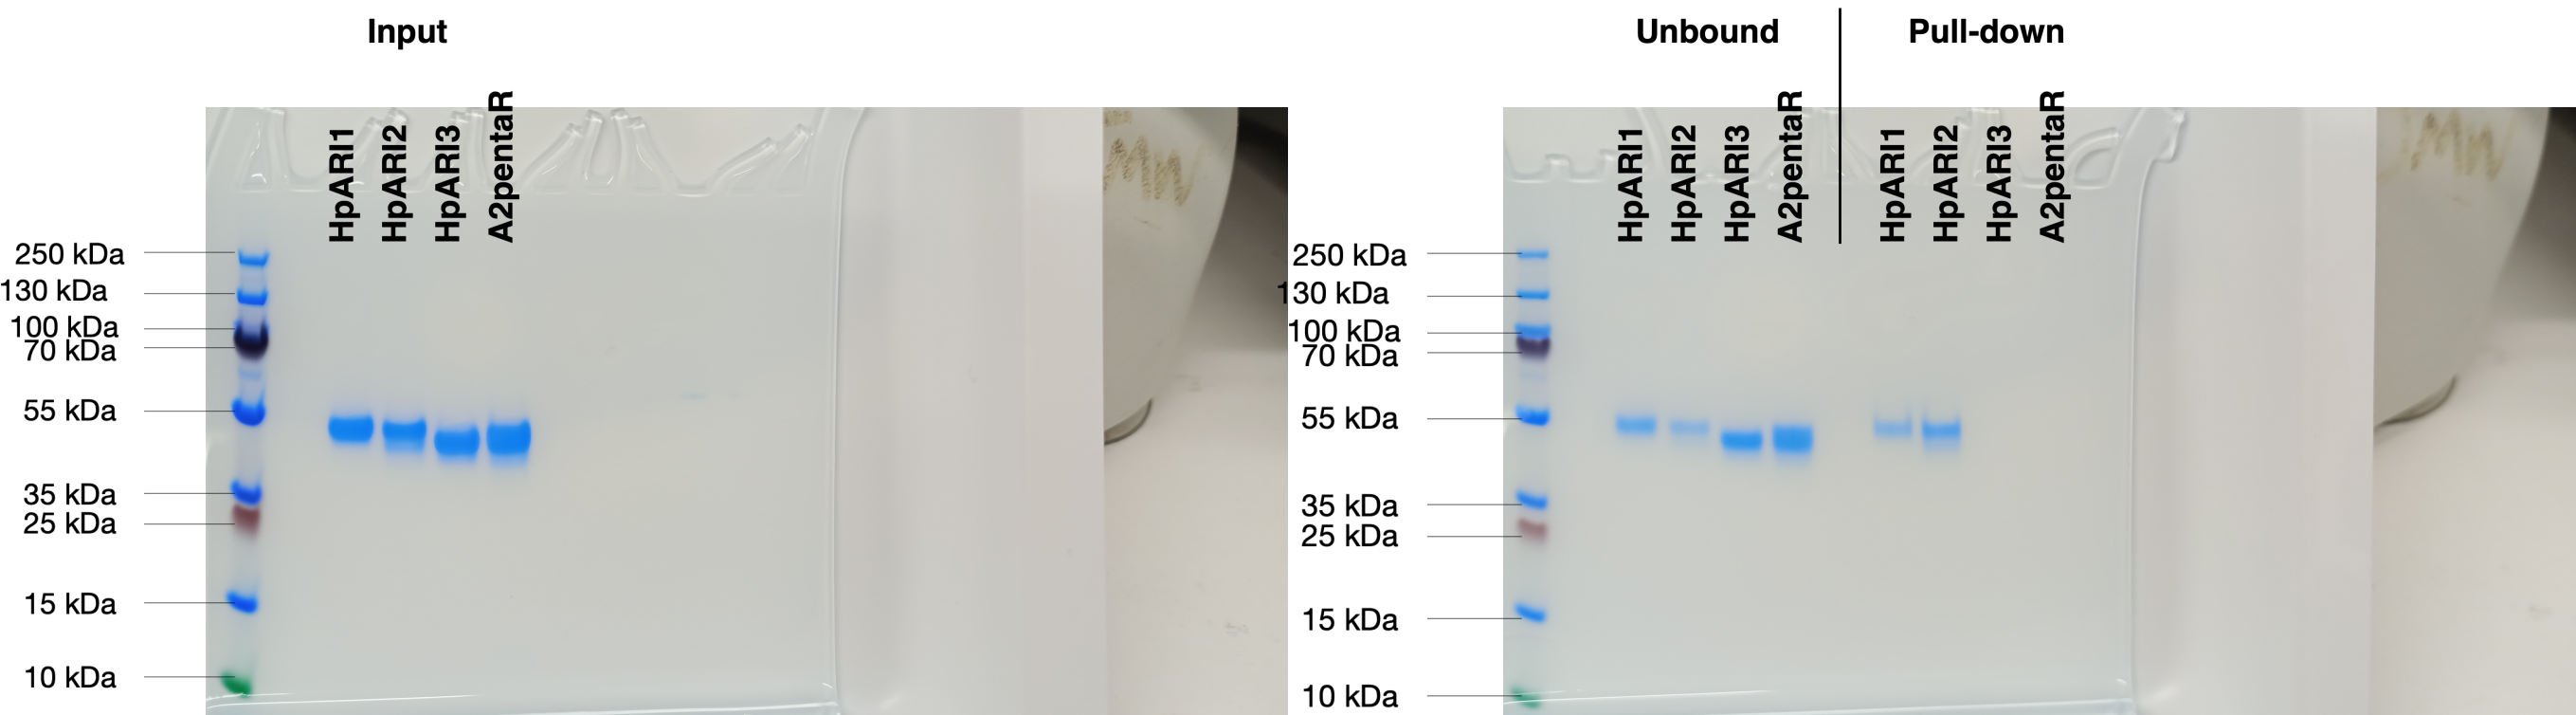

Images made greyscale to show in Fig 6B

# Fig 6C EMSA

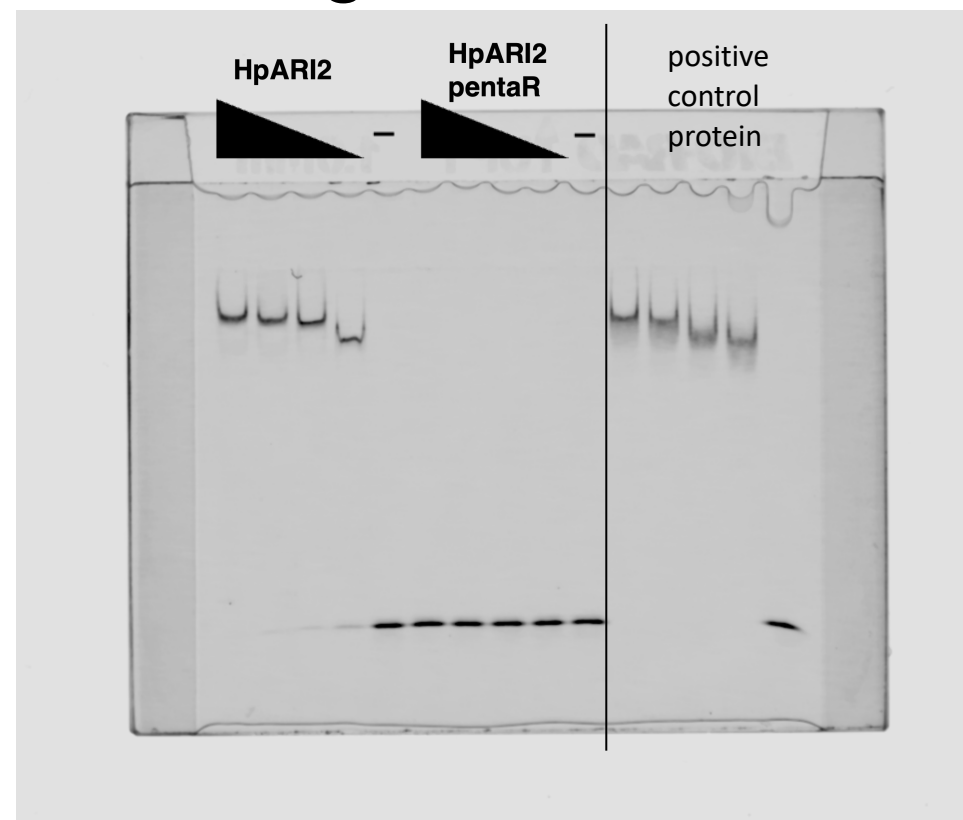

Supplement: fig6-data2 [file elife-99000-fig6-data2-v1.zip]
